# Supplementary material
Source: MDPI journal article supplement (https://www.mdpi.com/2073-4344/13/4/721)
Supplement: s1 [file s1]

## Electronic Supplementary Information (ESI)

# Molecular Cluster Complex of High Valence Chromium Selenide Carbonyl as Effective Electrocatalyst for Water Oxidation

Ibrahim Munkaila Abdullahi and Manashi Nath

The thermogravimetric analysis (TGA) of the Cr-Se red and Cr-Se green clusters describes the stepwise decomposition of each sample (Figure S1). The TGA of Cr-Se red in argon showed a gradual decrease in weight in three steps; at the first step between 0°C and 180 °C, 13.3 % weight loss was observed, due to the loss of lattice water.[1] The second weight loss from 180–240 °C corresponds to 38.7% (calcd. 30.5%) which can be attributed to the decomposition of tetraethyl amine.[2] Finally, in the range of 240–900 °C a weight loss of 21.52% (calcd. 22.9%) is attributable to the loss of seven coordinated CO molecules. Similarly, Cr-Se green showed three weight loss steps; where 10.7 % weight loss was observed between 0°C and 180 °C at the first step, confined to loss of lattice water. A to 34.4% (calcd. 30.5%) weight loss from 180–240 °C corresponds to the decomposition of tetraethyl amine. And a weight loss of 16.0% (calcd. 16.7%) in the range of 240–600 °C, attributed to the loss of seven coordinated water molecules. The percentage weight loss in the complexes is in agreement with the calculated values.

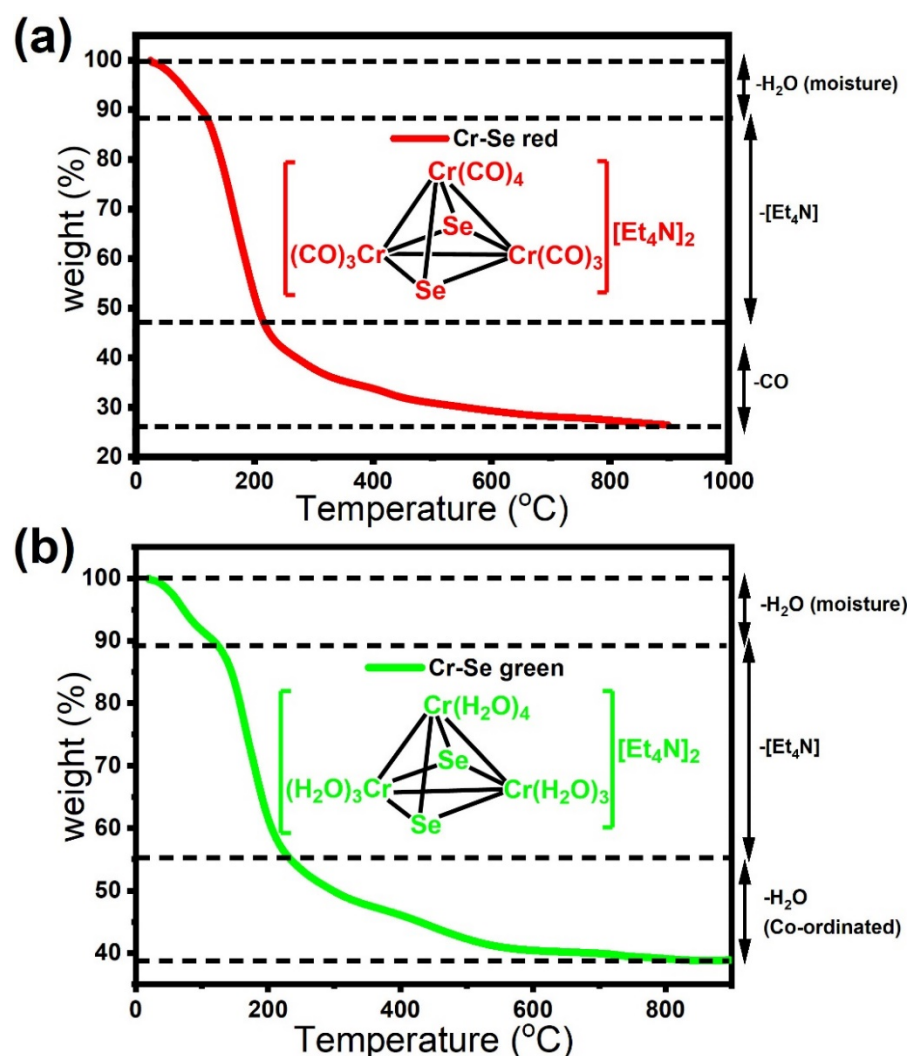

Figure S1. The thermogravimetric (TGA) analysis of (a) Cr-Se red; (b) Cr-Se green.

**Table S1.** Parameters of Equivalent Circuit Obtained from Fitting of EIS Experimental Data.

| Parameters                | Cr-Se red             | Cr-Se green           |
|---------------------------|-----------------------|-----------------------|
| R1/ohm                    | 1.38                  | 2.0                   |
| R2/ohm                    | 10.10                 | 12.02                 |
| R3/ohm                    | 19.84                 | 16.65                 |
| C1/F                      | $2.24 \times 10^{-2}$ | $3.9 \times 10^{-3}$  |
| W/s <sup>(1/2)</sup> /ohm | $6.61 \times 10^{-2}$ | $2.36 \times 10^{-2}$ |

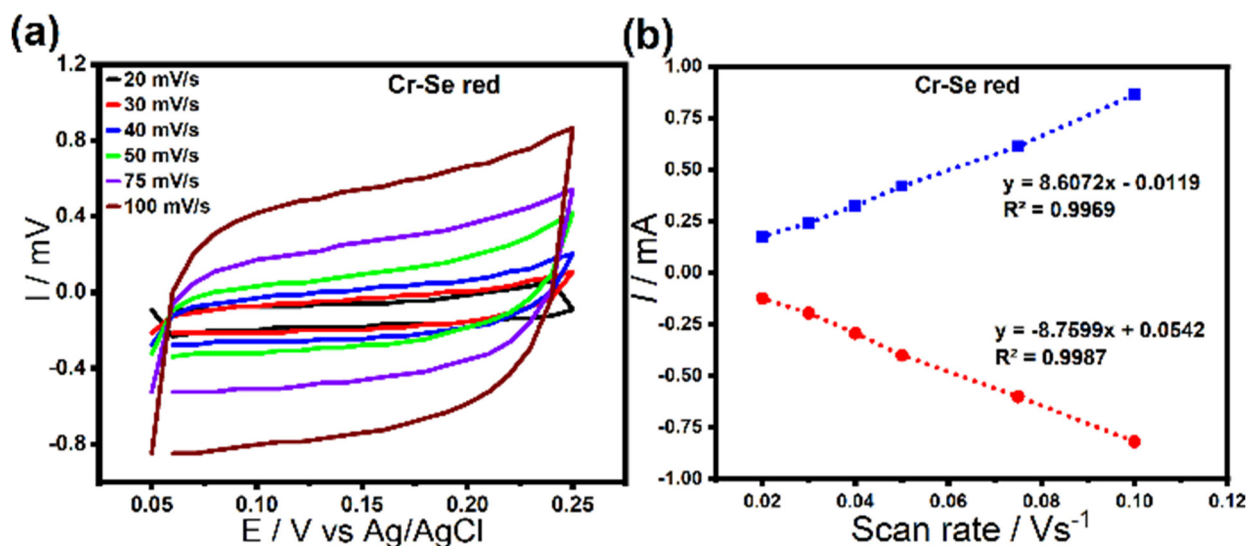

**Figure S2.** Electrochemical characterization of Cr-Se red catalyst; (a) Cyclic voltammograms measured at different scan rates. (b) The plots of anodic and cathodic currents measured as a function of scan rate.

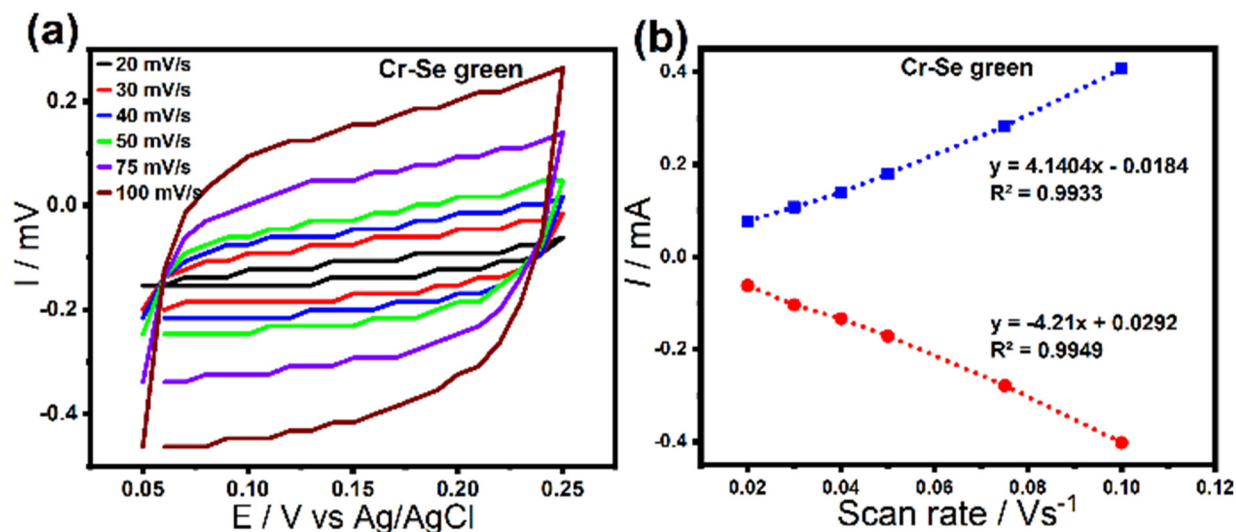

**Figure S3.** Electrochemical characterization of Cr-Se green catalyst; (a) Cyclic voltammograms measured at different scan rates. (b) The plots of anodic and cathodic currents measured as a function of scan rate.

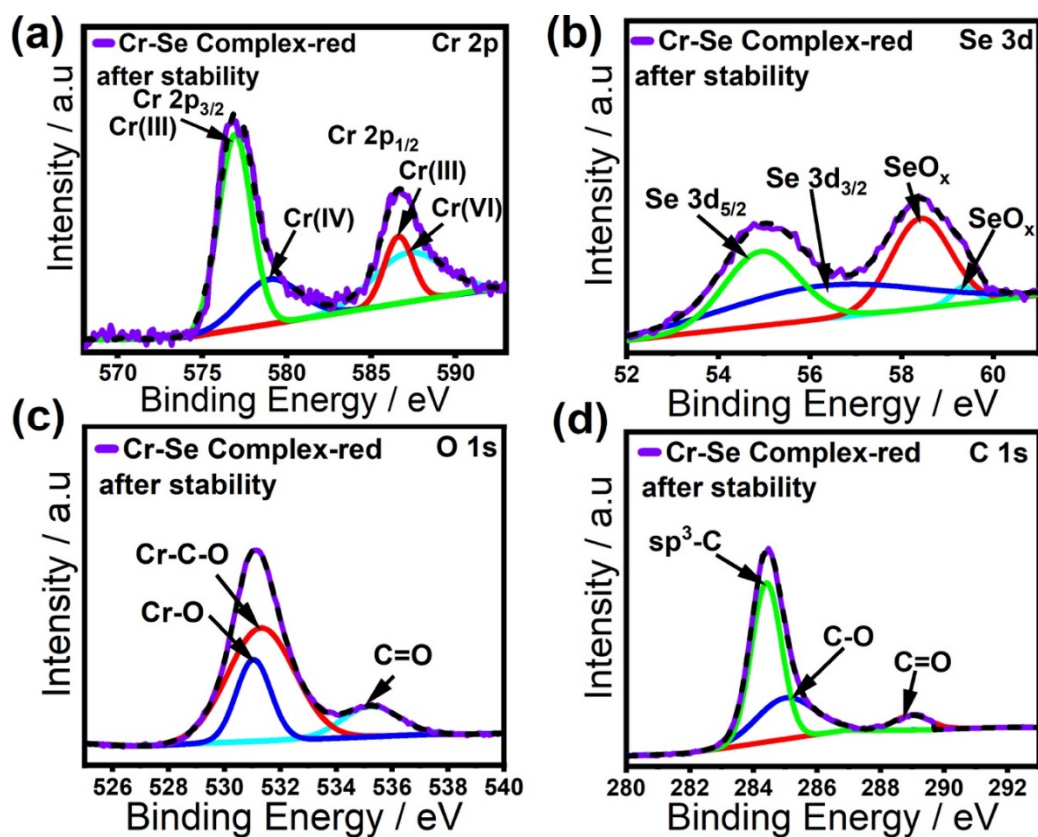

Figure S4. The high-resolution XPS spectra of the Cr-Se red complex after long term chronoamperometry showing (a) Cr 2p peak; (b) Se 3d peak; (c) surface O 1s peak; (d) C 1s peak.

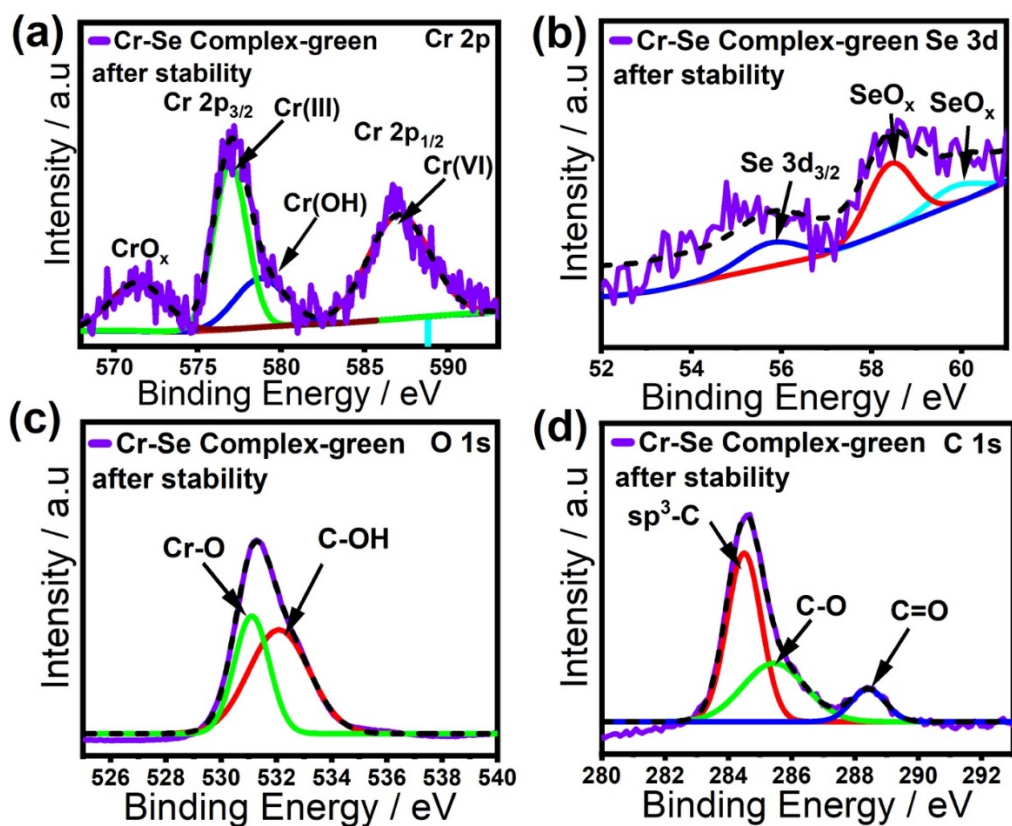

Figure S5. The high-resolution XPS spectra of the Cr-Se green complex after chronoamperometry showing (a) Cr 2p peak; (b) Se 3d peak; (c) surface O 1s peak; (d) C 1s peak.

**Table S2.** Comparison of the OER performances in an alkaline electrolyte (overpotential at 10 mA cm<sup>-2</sup> current density, and Tafel slope) of published recently chromium-based catalysts with our work.

| Catalysts                         | Electrolyte | Overpotential<br>( $\eta$ @ 10 mA.cm <sup>-2</sup> ) | Tafel slope<br>(mV dec <sup>-1</sup> ) | Substrate     | References |
|-----------------------------------|-------------|------------------------------------------------------|----------------------------------------|---------------|------------|
| *CoCr <sub>2</sub> O <sub>4</sub> | 1.0 M NaOH  | 400 mV                                               | 87 mV dec <sup>-1</sup>                | Glassy carbon | [3]        |
| *CoFeCr                           | 1.0 M KOH   | 330 mV                                               | 61 mV dec <sup>-1</sup>                | Ni foam       | [4]        |
| *NiCrFeO <sub>4</sub>             | 1.0 M KOH   | 298 mV                                               | 44.47 mV dec <sup>-1</sup>             | PAN           | [5]        |
| *Cr <sub>2</sub> S <sub>3</sub>   | 1.0 M KOH   | 230 mV                                               | 162 mV dec <sup>-1</sup>               | Carbon Fibre  | [6]        |
| *Cr(salen)Cl                      | 3.0 M NaOH  | 426 mV                                               | -                                      | Glassy carbon | [7]        |
| #\$Cr(H-byp)(bis-bpymd)           | OH          | 390 mV                                               | -                                      | -             | [8]        |
| #\$Cr(tpy)(py)(isoquin)           | OH          | 380 mV                                               | -                                      | -             | [8]        |
| #\$Cr(DPA)(2,2'-bpymd)            | OH          | 320 mV                                               | -                                      | -             | [8]        |
| * $\gamma$ -CrOOH                 | 1.0 KOH     | 334 mV                                               | 41.4 mV dec <sup>-1</sup>              | NF            | [9]        |
| *CrON                             | 1.0 KOH     | 409 mV                                               | 157 mV dec <sup>-1</sup>               | Carbon paper  | [10]       |
| Cr-Se red                         | 1.0 M KOH   | 310.0 mV                                             | 82 mV dec <sup>-1</sup>                | Carbon paper  | This work  |
| Cr-Se green                       | 1.0 M KOH   | 350.0 mV                                             | 107 mV dec <sup>-1</sup>               | Carbon paper  | This work  |

\* Bulk solid samples, # Complexes, \$ Computational study.

## References

- Bügel, P.; Krummenacher, I.; Weigend, F.; Eichhöfer, A. Experimental and Theoretical Evidence for Low-Lying Excited States in [Cr<sub>6</sub>E<sub>8</sub>(PET<sub>3</sub>)<sub>6</sub>] (E = S, Se, Te) Cluster Molecules. *Dalton Trans.* **2022**, 51, 14568–14580, doi:10.1039/d2dt01690g.
- Gao, H.; Li, J.; Lian, K. Alkaline Quaternary Ammonium Hydroxides and Their Polymer Electrolytes for Electrochemical Capacitors. *RSC Adv.* **2014**, 4, 21332–21339, doi:10.1039/c4ra01014k.
- Lin, C.C.; McCrory, C.C.L. Effect of Chromium Doping on Electrochemical Water Oxidation Activity by Co<sub>3</sub>-XCr<sub>x</sub>O<sub>4</sub> Spinel Catalysts. *ACS Catal.* **2017**, 7, 443–451, doi:10.1021/acscatal.6b02170.
- Bo, X.; Li, Y.; Chen, X.; Zhao, C. Operando Raman Spectroscopy Reveals Cr-Induced-Phase Reconstruction of NiFe and CoFe Oxyhydroxides for Enhanced Electrocatalytic Water Oxidation. *Chem. Mater.* **2020**, 32, 4303–4311, doi:10.1021/acs.chemmater.0c01067.
- Ramakrishnan, P.; Beom Lee, K.; Choi, G.J.; Park, I.K.; Inn Sohn, J. Porous Hollow Nanorod Structured Chromium-Substituted Inverse Spinel Compound: An Efficient Oxygen Evolution Reaction Catalyst. *J. Ind. Eng. Chem.* **2021**, 101, 178–185, doi:10.1016/j.jiec.2021.06.015.
- Shifa, T.A.; Mazzaro, R.; Morandi, V.; Vomiero, A. Controllable Synthesis of 2D Nonlayered Cr<sub>2</sub>S<sub>3</sub> Nanosheets and Their Electrocatalytic Activity Toward Oxygen Evolution Reaction. *Front. Chem. Eng.* **2021**, 3, 1–7, doi:10.3389/fceng.2021.703812.
- Shamsipur, M.; Taherpour, A. (Arman); Sharghi, H.; Lippolis, V.; Pashabadi, A. A Low-Overpotential Nature-Inspired Molecular Chromium Water Oxidation Catalyst. *Electrochim Acta* **2018**, 265, 316–325, doi:10.1016/j.electacta.2018.01.202.
- Craig, M.J.; García-Melchor, M. High-Throughput Screening and Rational Design to Drive Discovery in Molecular Water Oxidation Catalysis. *Cell Rep. Phys. Sci.* **2021**, 2, doi:10.1016/j.xcrp.2021.100492.
- Sun, Z.; Yuan, M.; Yang, H.; Lin, L.; Jiang, H.; Ge, S.; Li, H.; Sun, G.; Ma, S.; Yang, X. 3D Porous Amorphous  $\gamma$ -CrOOH on Ni Foam as Bifunctional Electrocatalyst for Overall Water Splitting. *Inorg. Chem.* **2019**, doi:10.1021/acs.inorgchem.9b00112.
- Kumar, U.N.; Malek, A.; Rao, G.R.; Thomas, T. Chromium Oxynitride (CrON) Nanoparticles: An Unexplored Electrocatalyst for Oxygen Evolution Reaction. *Electrocatalysis* **2022**, 13, 62–71, doi:10.1007/s12678-021-00693-4.
